# Supplementary material for: A silver–copper metallic glass electrocatalyst with high activity and stability comparable to Pt/C for zinc–air batteries
Source: Royal Society of Chemistry journal article supplement (doi:10.1039/c5ta09266c), 2016-01-01
Supplement: c5ta09266c1.pdf [file c5ta09266c1.pdf]

## Supporting Information

### **Silver-Copper Metallic Glass Electrocatalyst with High Activity and Stability Comparable to Pt/C for Zinc–Air Batteries**

*Xiaoqiang Wu,<sup>a</sup> Fuyi Chen,<sup>a\*</sup> Nan Zhang,<sup>a</sup> Adnan Qaseem<sup>a</sup> and Roy L. Johnston<sup>b\*</sup>*

State Key Laboratory of Solidification Processing, Northwestern Polytechnical University,  
Xian, 710072, China

\*Address Correspondence to: fuyichen@nwpu.edu.cn (Fuyi Chen). r.l.johnston@bham.ac.uk  
(Roy L. Johnston)

*Part 1. TEM results of AgCu-MG catalyst*

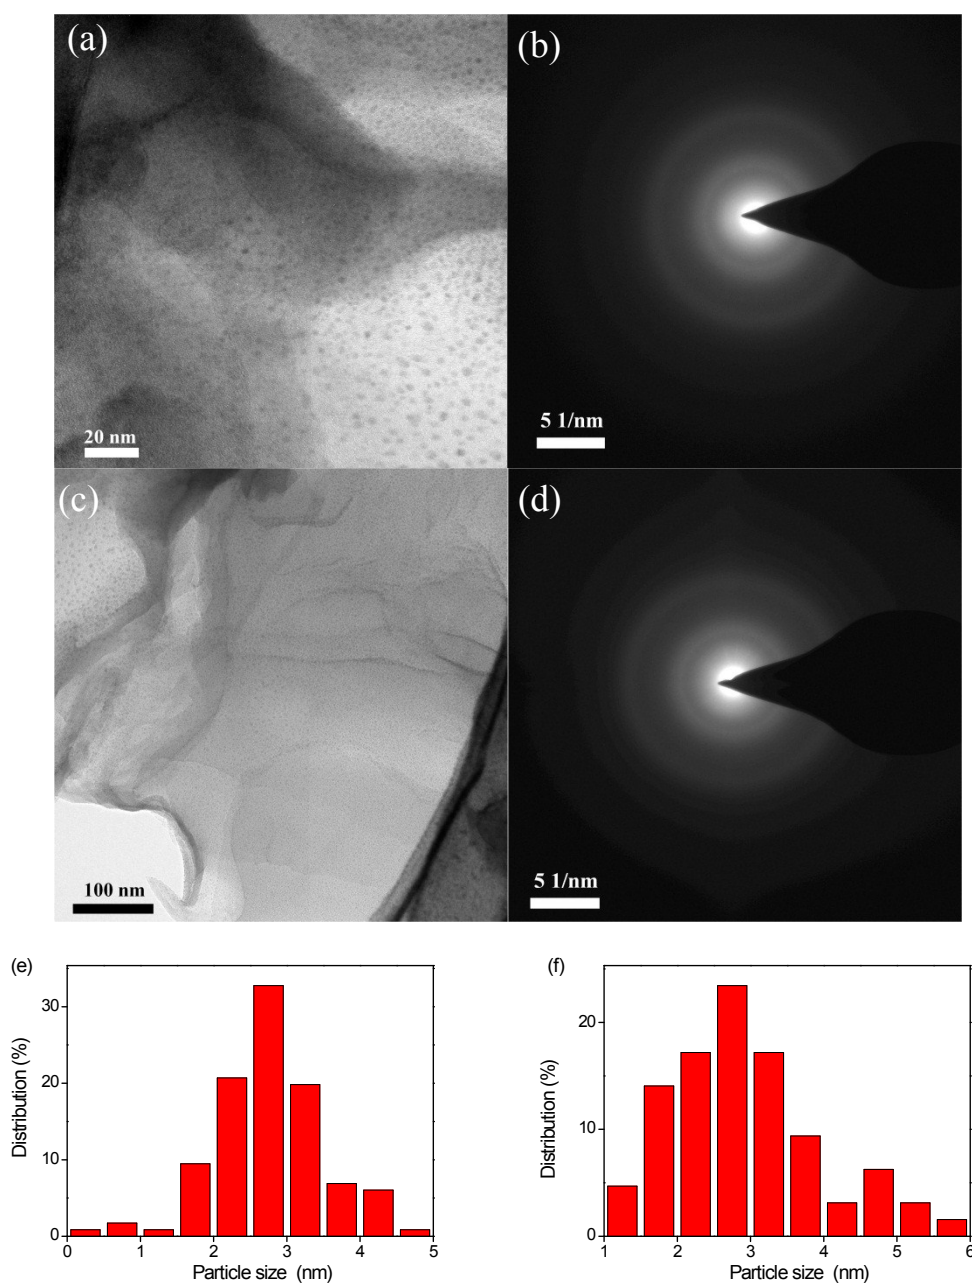

**Figure S1.** (a-d) TEM images, selected area diffraction patterns and, (e-f) particle size distribution of the AgCu-MG.

**Part 2. The method of preparation of XRD patterns and the results of AgCu-MG catalyst**

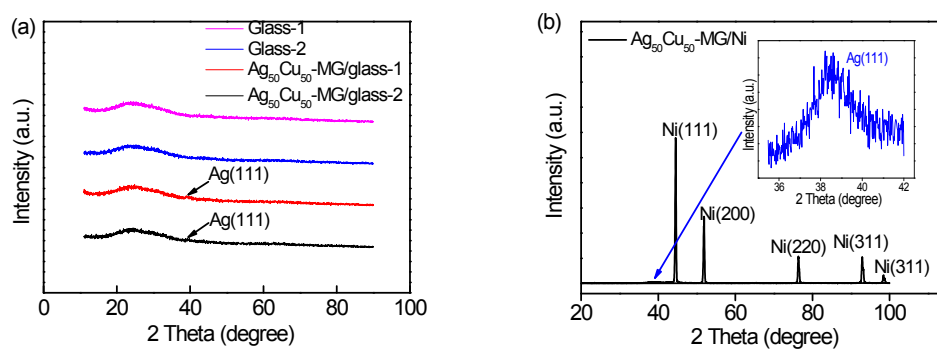

**Figure S2.** (a) Comparative X-ray diffraction of glass and AgCu-MG on a plain glass, (b) X-ray diffraction of AgCu-MG on nickel foam.

*Part 3. The SEM patterns and the Elements mapping of the AgCu-MG catalyst*

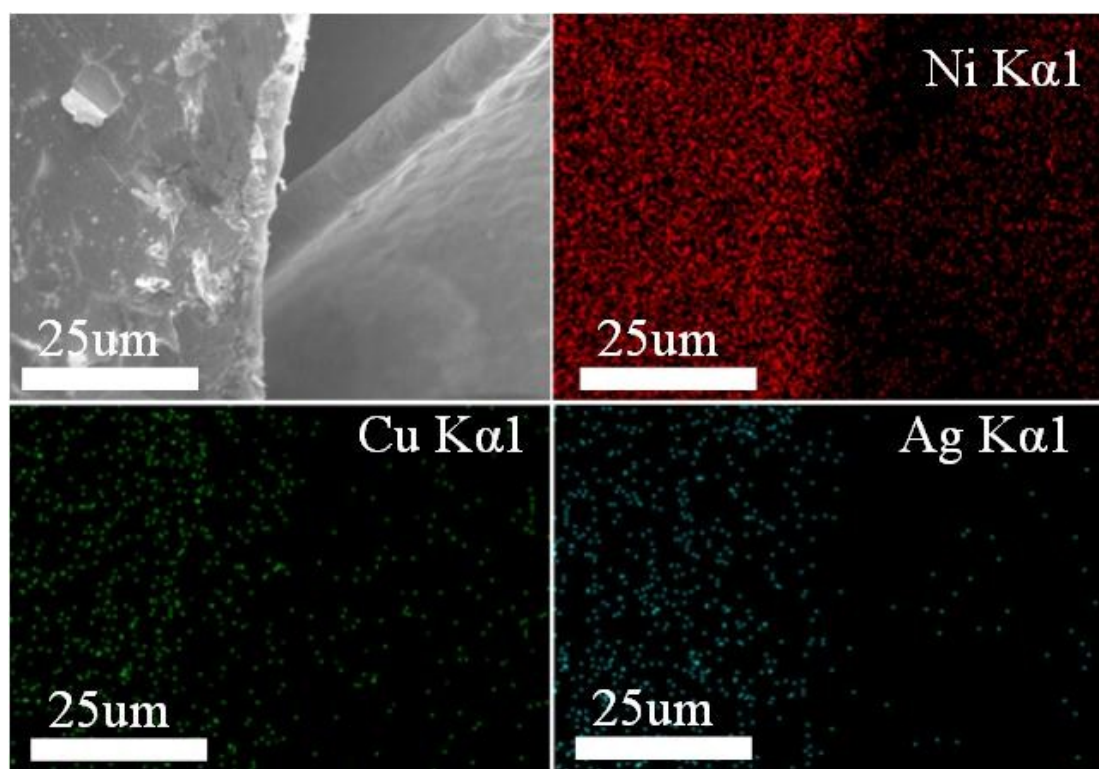

**Figure S3.** Elements mapping and the SEM image of the AgCu-MG on nickel foam.

### Part 4. Kinetic of oxygen reduction

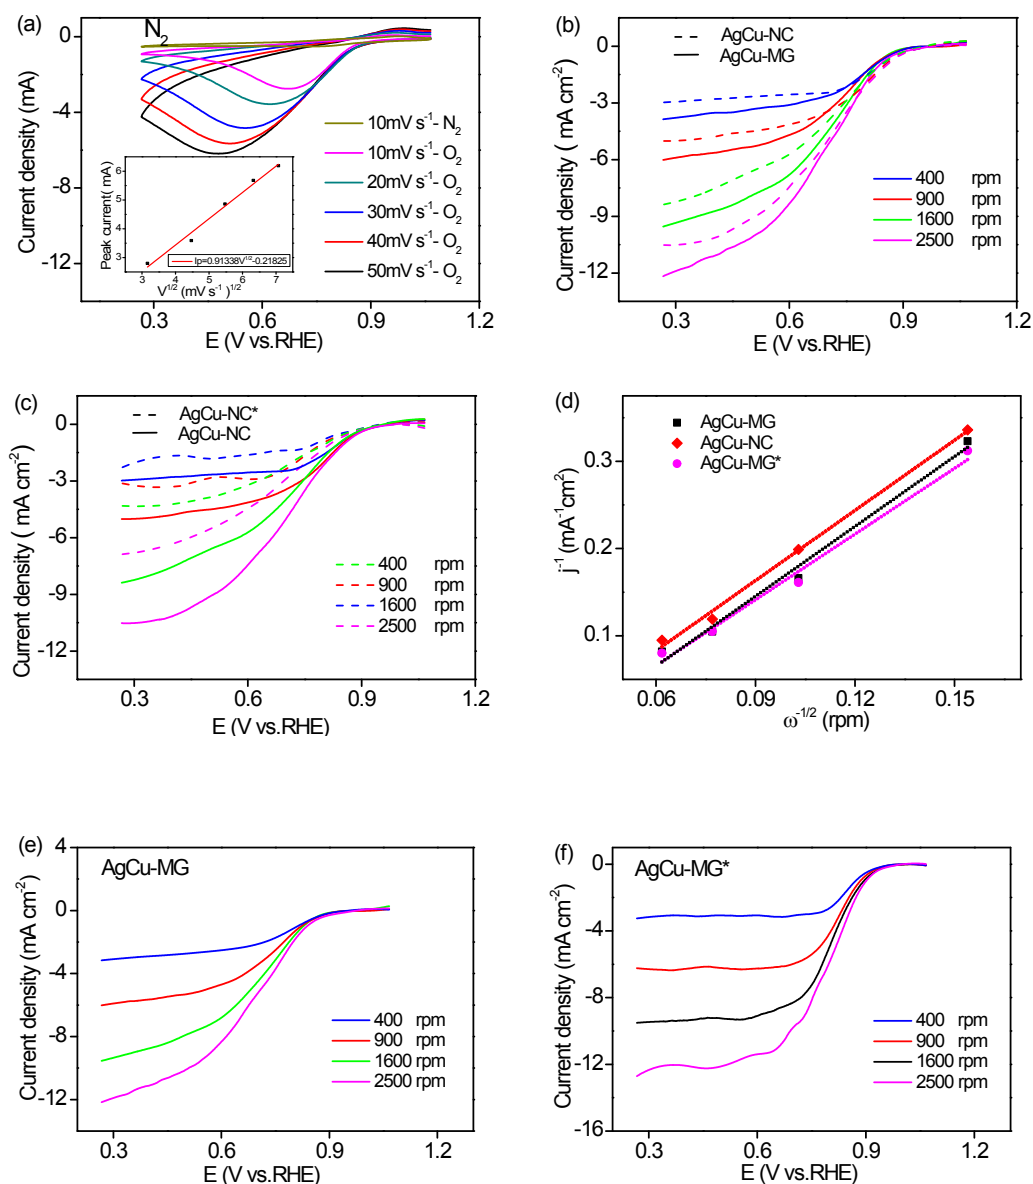

**Figure S4.** (a) The CV curves of the AgCu-MG catalyst in  $N_2$  and  $O_2$  saturated solution, (b) ORR polarization curves of the AgCu-MG, dash lines present the corresponding patterns AgCu-NC (AgCu nanocrystalline catalyst), (c) ORR polarization curves of the AgCu-NC, dash lines present the corresponding patterns after 1000 CV cycles, (d) The Koutecky-Levich plots at the limiting current of the AgCu-MG, AgCu-NC and AgCu-MG\* catalysts, (e) ORR polarization curves of AgCu-MG in various rotation speeds, (f) ORR polarization curves of AgCu-MG\* in various rotation speeds.

The reduction of  $O_2$  in alkaline electrolytes can proceed through one of two pathways. The first pathway is  $O_2$  directly reduction to  $OH^-$  ions, which is called the four-electron

pathway, as equation 1, and the second pathway is O<sub>2</sub> reduction to HO<sub>2</sub><sup>-</sup> ions as equation 2 and subsequent reduction of peroxide ion to OH<sup>-</sup> as equation 3 or decomposition of peroxide ion as equation 4, which is called two-electron pathway:

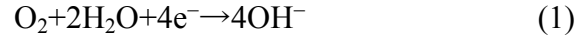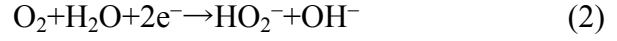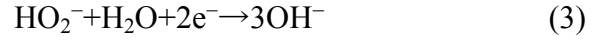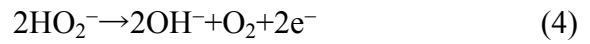

According to the Koutecky-Levich equations, the number (n) of electrons transferred in the ORR process can be obtained from the RDE results. The Koutecky-Levich equations are as following:

$$j^{-1} = j_k^{-1} + (0.62nFC_0D^{2/3}\nu^{-1/6}\omega^{1/2})^{-1} \quad (5)$$

$$j_k^{-1} = (nFAKTC_0)^{-1} \quad (6)$$

Where j is the measured electrode current density, j<sub>k</sub> is the kinetic current density, and ω is the electrode rotation rate. The value of D is 1.9 × 10<sup>-5</sup> cm<sup>2</sup>/s, C<sub>0</sub> is 1.2 × 10<sup>-3</sup> mol/L, ν is 1.1 × 10<sup>-2</sup> cm<sup>2</sup>/s, and F is 96485 C/mol, A is the electrode area, K is the kinetic rate constant for catalytic reaction, T is the quantity of catalyst on the surface of the electrode.

**Part 5. XPS results of AgCu-alloy patterns**

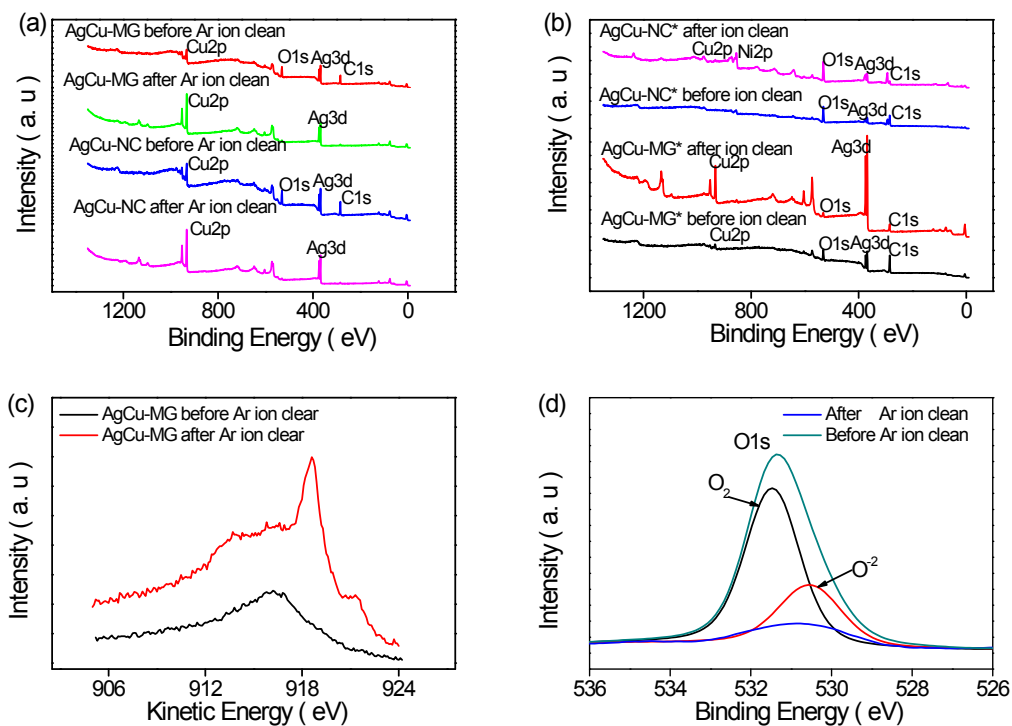

**Figure S5.** (a) Full survey scan XPS before and after Ar ion etching for the AgCu-MG and AgCu-NC samples, (b) for the AgCu-MG\* and AgCu-NC\* (c) Auger lines (AES) of Cu in AgCu-MG before and after ion clean. (d) O<sub>1s</sub> regions in AgCu-MG before and after ion clean.

**Part 6. Schematic of AuCu-MG-based air electrode and rechargeable zinc-air battery**

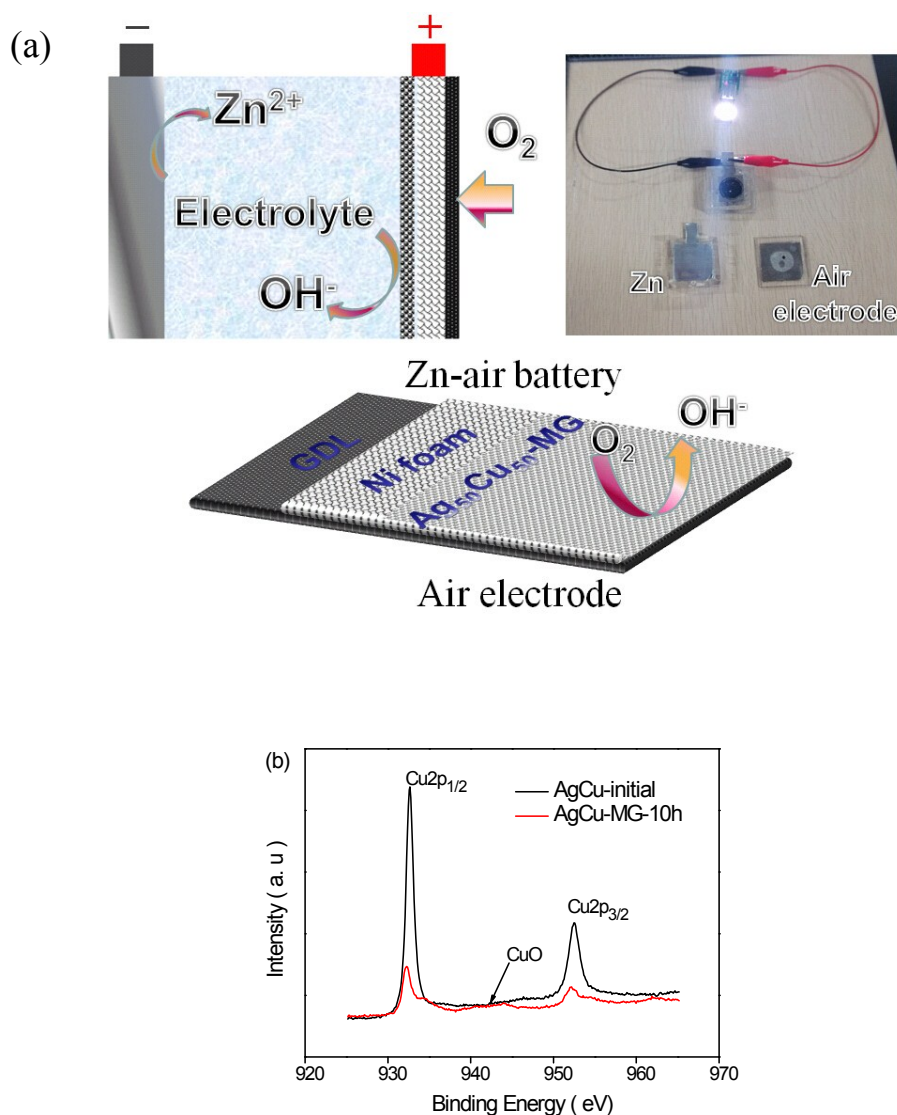

**Figure S6.** (a) Schematic of air electrode and a zinc-air battery, and a digital photograph of LED lights powered by the zinc-air battery systems, (b) XPS analysis of AgCu-MG after discharge for 10 hours in Zn-air battery.

(I) For primary Zn-air system, we choose 6M KOH solution as electrolyte, electrochemical reactions that occur in primary Zn-air system as follows:

(1) Discharge

Zinc plate (negative electrode):

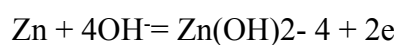



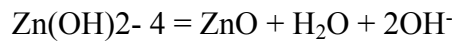

Air electrode (positive electrode):

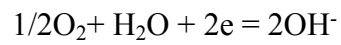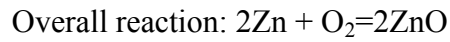

(II) For primary Zn-air system, we choose 6M KOH +0.1M Zn(CH<sub>3</sub>COO)<sub>2</sub> solution as electrolyte, electrochemical reactions that occur in primary Zn-air system as follows:

(1) Discharge

Zinc plate (negative electrode):

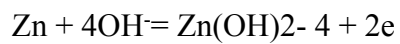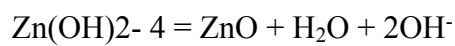

Air electrode (positive electrode):

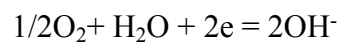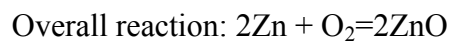

(2) Charge

Zinc plate (cathode):

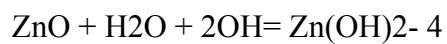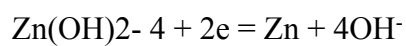

Air electrode (anode):

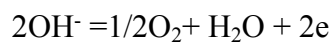

Overall reaction:

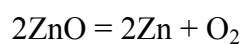

**Part 7. A long-term discharge–charge cycling of two-electrode chargeable zinc–air batteries based on AgCu-MG catalysts**

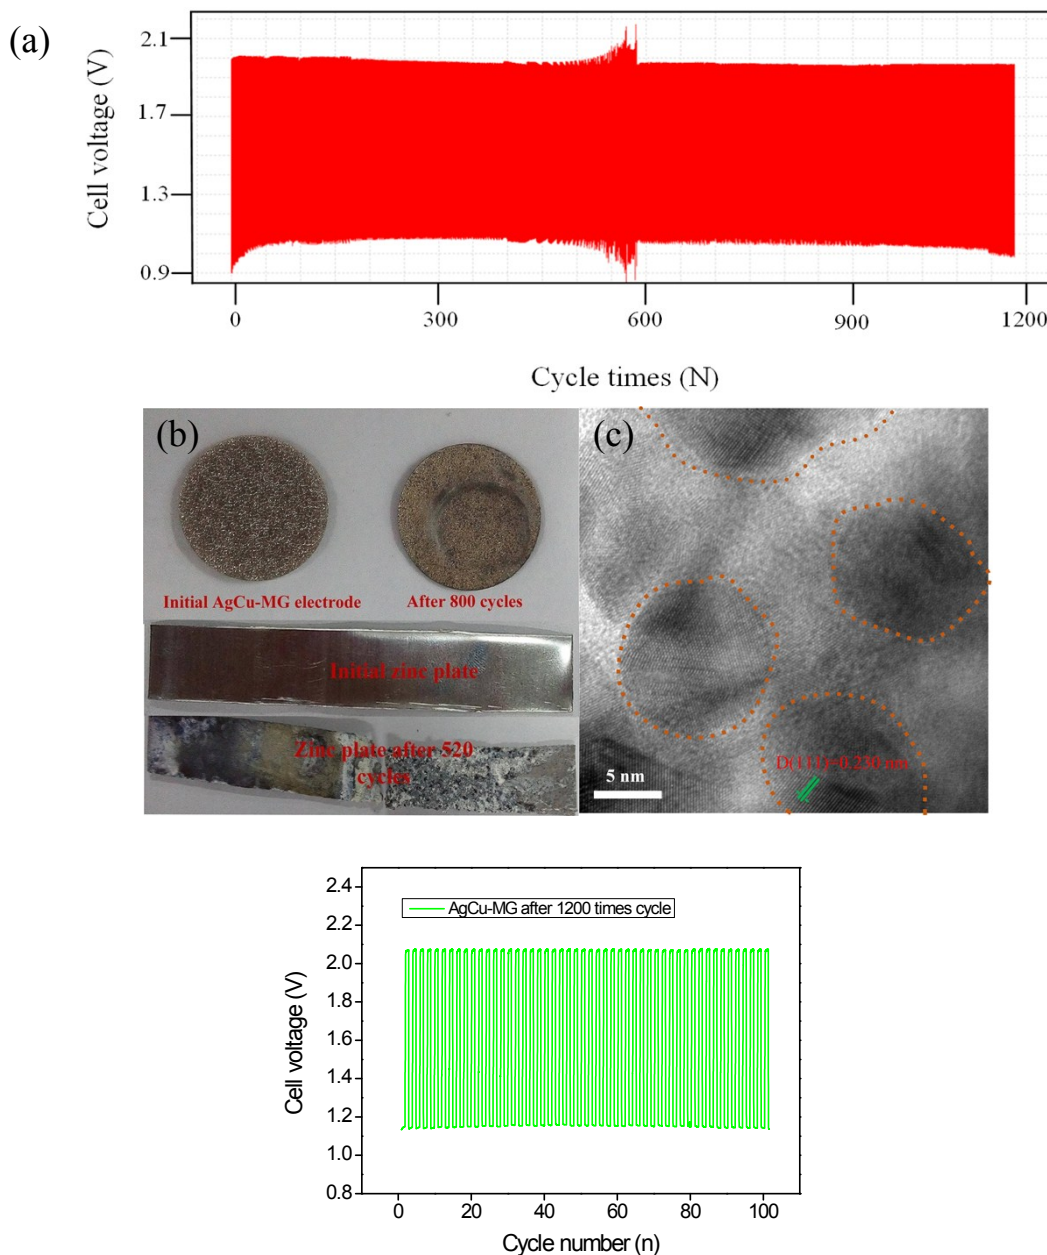

**Figure S7.** (a) A discharge–charge cycling of two-electrode rechargeable zinc–air batteries based on AgCu-MG catalysts for more than 1000 times when only air is used for test, (b) Images of AgCu-MG catalysts on nickel foam before and after 1000 cycles, and images of the initial zinc plate anode and the broken zinc plate anode at 520 discharge–charge cycle, (c) HRTEM images of the AgCu-MG after 1200 times charge-discharge cycle, (d) The charge-discharge curves of the AgCu-MG catalyzed cathode after 1200 times cycle. In this battery, the zinc anode and electrolyte were replaced.
